# Supplementary figures and images for: Penetration, photo-reactivity and photoprotective properties of nanosized ZnO
Source: Royal Society of Chemistry journal article supplement (doi:10.1039/c3pp50373a), 2014-05-12

## ZnO

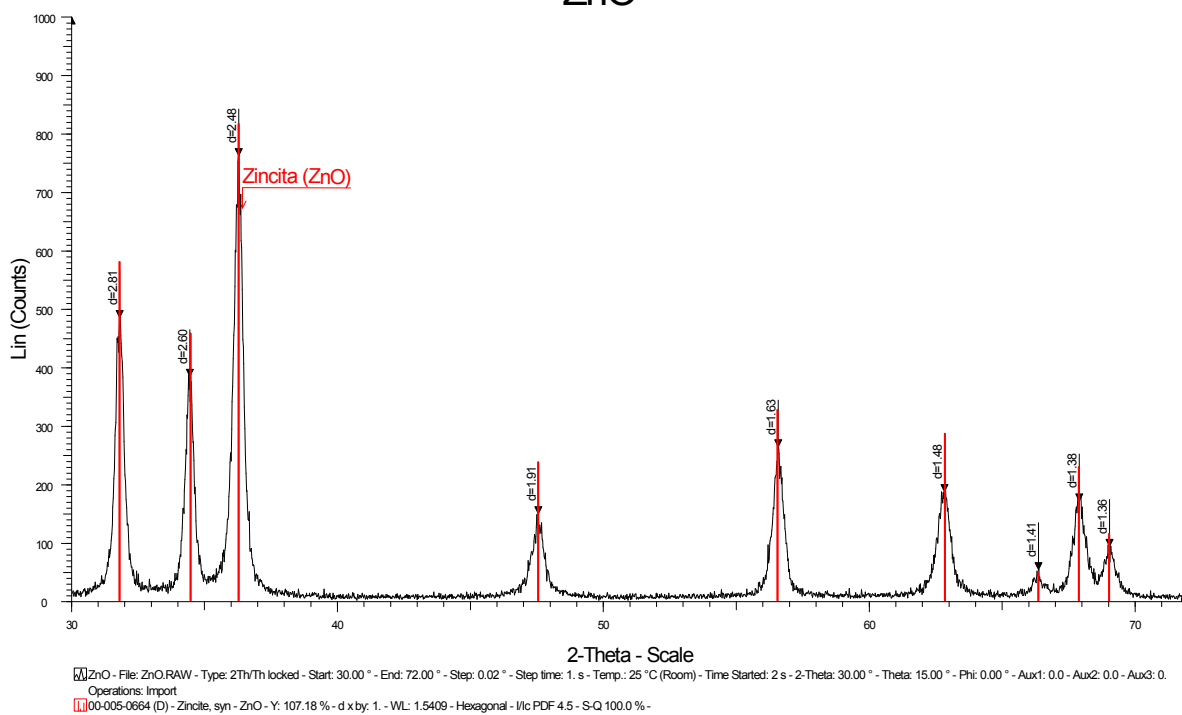

SM1. X-ray diffractogram of Nanosun™ 99/30.

Supplement: c3pp50373a1.pdf [file c3pp50373a1.pdf]
